# Supplementary material for: A novel scoring function for discriminating hyperthermophilic and mesophilic proteins with application to predicting relative thermostability of protein mutants
Source: Springer Nature journal article supplement (doi:10.1186/1471-2105-11-62), 2010-01-28

## **Additional File 1**

### ***Contents***

1. Table S1. Detailed description of the 10 features used to construct the scoring function.
2. Table S2. A test of the discriminative ability for the scoring function on a dataset containing 63 hyperthermophilic-mesophilic protein pairs and 310 thermophilic-mesophilic protein pairs.
3. Figure S1. The ROC curve of the scoring function in discrimination of 540 pairs of ortholog protein sequences accumulated from the 5-fold cross testing set.

**Table S1.** Detailed description of the 10 features used in the scoring function.

| Protein features    | Feature description                                                            |
|---------------------|--------------------------------------------------------------------------------|
| $x_{\text{pos}}$    | The composition of positively charged residues R, K and H                      |
| $x_{\text{charge}}$ | The composition of charged residues R, K, H, D and E                           |
| $x_{\text{small}}$  | The composition of small residues T and D                                      |
| $x_{\text{tiny}}$   | The composition of tiny residues A, G, P and S                                 |
| $x_{\text{A}}$      | The composition of residue A                                                   |
| $x_{\text{E}}$      | The composition of residue E                                                   |
| $x_{\text{K}}$      | The composition of residue K                                                   |
| $x_{\text{Q}}$      | The composition of residue Q                                                   |
| $x_{\text{T}}$      | The composition of residue T                                                   |
| ASA                 | The average of the maximum solvent accessible surface area of each amino acid* |

\* Frank Eisenhaber PA: **Improved strategy in analytic surface calculation for molecular systems: Handling of singularities and computational efficiency.** *Journal of Computational Chemistry* 1993, **14**(11):1272-1280.

**Table S2.** A test of the discriminative ability for the scoring function on the dataset containing 63 hyperthermophilic-mesophilic protein pairs and 310 thermophilic-mesophilic protein pairs from the 373 well culled homologous pairs by Glyakina AV, et al. Different packing of external residues can explain differences in the thermostability of proteins from thermophilic and mesophilic organisms. *Bioinformatics* 2007, 23(17): 2231-2238.

Part A. 63 hyperthermophilic-mesophilic protein pairs, 59 pairs were correctly predicted.

| Hyperthermophilic | Mesophilic | Score_value | Correct? |
|-------------------|------------|-------------|----------|
| 1wdvA             | 1dbuA      | -0.353      | NO       |
| 2cv4A             | 1prxA      | -0.463      | NO       |
| 1mowA             | 1g9zA      | 0.060       | YES      |
| 1hv8A             | 1xtiA      | 0.439       | YES      |
| 1ki9A             | 1khtA      | 0.344       | YES      |
| 1rqgA             | 1qqtA      | 0.874       | YES      |
| 1rqgA             | 1qqtA      | 0.874       | YES      |
| 1pznA             | 1xu4A      | 0.246       | YES      |
| 1aj8A             | 1a59A      | 1.091       | YES      |
| 1xi3A             | 2tpsA      | 0.481       | YES      |
| 1bq8A             | 1iroA      | 0.259       | YES      |
| 1sj1A             | 1fxdA      | 0.599       | YES      |
| 1e19A             | 1b7bA      | 0.752       | YES      |
| 1xi8A             | 1g81A      | 1.663       | YES      |
| 1xx7A             | 2paqB      | 0.608       | YES      |
| 1s4eF             | 1pieA      | 0.654       | YES      |
| 1s4eF             | 1pieA      | 0.654       | YES      |
| 1a1sA             | 1dxhA      | -0.034      | NO       |
| 1a81A             | 1hyuA      | 0.670       | YES      |
| 1v8zA             | 1a5aB      | 0.686       | YES      |
| 1xgsA             | 1r58A      | 0.415       | YES      |
| 1jg2A             | 1i1nA      | 0.938       | YES      |
| 1geqB             | 1rd5A      | 0.812       | YES      |
| 1iqpA             | 1sxjB      | 0.360       | YES      |
| 1xexB             | 1w1wB      | 0.289       | YES      |
| 1v3wA             | 1xhdA      | 0.340       | YES      |
| 1uddA             | 1yafA      | 0.575       | YES      |
| 1v8aA             | 1c3qA      | 0.929       | YES      |
| 1im5A             | 1j2rA      | 1.502       | YES      |
| 1v30A             | 1xhsA      | 2.313       | YES      |
| 1v6tA             | 1xw8A      | 1.512       | YES      |
| 1wlsA             | 1nnsA      | 1.111       | YES      |
| 1wlsA             | 1nnsA      | 1.111       | YES      |
| 2bj7A             | 1q5yA      | 1.118       | YES      |
| 1lk5A             | 1m0sA      | 0.344       | YES      |
| 1gd9A             | 1j32A      | 1.043       | YES      |
| 1iq8A             | 1wkeA      | 1.113       | YES      |
| 1w2iA             | 2acyA      | 0.074       | YES      |
| 1j0aA             | 1f2dA      | 0.499       | YES      |
| 1iz6A             | 1xtdA      | 0.742       | YES      |
| 1d3uB             | 1c9bA      | 0.824       | YES      |
| 1d3uB             | 1c9bA      | 0.824       | YES      |

|       |       |        |     |
|-------|-------|--------|-----|
| 1qypA | 1tfiA | -0.208 | NO  |
| 1a2zA | 1augA | 0.460  | YES |
| 1ny5A | 1peyA | 0.778  | YES |
| 1hqkA | 1rvv1 | 0.505  | YES |
| 1fxqA | 1g7vA | 0.374  | YES |
| 1pybA | 3ersX | 0.703  | YES |
| 1oz9A | 1xm5A | 2.238  | YES |
| 1l8qA | 1j1vA | 0.787  | YES |
| 1oy5A | 1p9pA | 1.575  | YES |
| 1ulzA | 1dv1A | 0.430  | YES |
| 1ulzA | 1dv1A | 0.430  | YES |
| 1ulzA | 1dv1A | 0.430  | YES |
| 1wy5A | 1ni5A | 2.567  | YES |
| 1lfpA | 1mw7A | 0.242  | YES |
| 1lfpA | 1mw7A | 0.242  | YES |
| 1udnA | 1r6lA | 0.765  | YES |
| 1udnA | 1r6lA | 0.765  | YES |
| 1ny5A | 1ojlB | 1.810  | YES |
| 1ny5A | 1ojlB | 1.810  | YES |
| 1c3rA | 1t64A | 0.968  | YES |
| 1wvrC | 1p6oA | 0.692  | YES |

Part B. Out of a total of 310 thermophilic-mesophilic protein pairs, 238 pairs were correctly predicted.

| Thermophilic | Mesophilic | Score_value | Correct? |
|--------------|------------|-------------|----------|
| 1m5hA        | 1m5sA      | 0.061       | YES      |
| 1q6wA        | 1iq6A      | 0.679       | YES      |
| 1hjzA        | 1spvA      | 1.780       | YES      |
| 1jnrA        | 1nekA      | 0.692       | YES      |
| 1omoA        | 1x7dA      | 0.658       | YES      |
| 1jjiA        | 1lzlA      | 1.479       | YES      |
| 1p1lA        | 1oscA      | 0.873       | YES      |
| 1rxvA        | 1ul1Z      | -0.202      | NO       |
| 1rxvA        | 1ul1Z      | -0.202      | NO       |
| 1rwzA        | 1sxjG      | 0.472       | YES      |
| 1rwzA        | 1sxjG      | 0.472       | YES      |
| 1j2pA        | 1rypG      | -0.029      | NO       |
| 1sauA        | 1yx3A      | 0.824       | YES      |
| 1y1lA        | 1ljlA      | 0.367       | YES      |
| 1u1iA        | 1p1jA      | 0.407       | YES      |
| 1vimD        | 1m3sB      | 0.586       | YES      |
| 1gkuB        | 1mw8X      | 0.394       | YES      |
| 1t7lA        | 1u1hA      | 0.824       | YES      |
| 1t7lA        | 1u1hA      | 0.824       | YES      |
| 1mroA        | 1e6yA      | -0.175      | NO       |
| 1mroC        | 1e6yC      | 0.434       | YES      |
| 1hbnB        | 1e6yB      | 0.269       | YES      |
| 1hbnB        | 1e6yB      | 0.269       | YES      |
| 1gtdA        | 1t4aA      | -1.098      | NO       |
| 1ep0A        | 1upiA      | 1.798       | YES      |
| 1g5cA        | 1ylkA      | 0.837       | YES      |
| 1lvwA        | 1mp3A      | 0.470       | YES      |
| 1lxnA        | 1lxjA      | -0.368      | NO       |
| 1km2A        | 1eixA      | 0.231       | YES      |
| 1lssA        | 1lsuA      | 0.403       | YES      |

|       |       |        |     |
|-------|-------|--------|-----|
| 1g9xA | 1g6hA | -0.007 | NO  |
| 1nvtA | 1npdA | 0.917  | YES |
| 1nvtA | 1npdA | 0.917  | YES |
| 1xhkA | 1rr9D | 0.420  | YES |
| 1twiA | 1hkvA | 1.543  | YES |
| 1fszA | 1ofuA | 0.977  | YES |
| 1fszA | 1ofuA | 0.977  | YES |
| 1f5sA | 1181B | 1.278  | YES |
| 1g0hA | 1imbA | 1.066  | YES |
| 1g0hA | 1imbA | 1.066  | YES |
| 1snnA | 1k4iA | 1.208  | YES |
| 1g61A | 1g62A | 1.712  | YES |
| 1go3M | 1y14D | 0.673  | YES |
| 1b78A | 1k7kA | 1.478  | YES |
| 1qztA | 1td9A | -0.154 | NO  |
| 1lojA | 1n9rA | 0.449  | YES |
| 1nj1A | 1nyrA | -0.247 | NO  |
| 1lnqA | 1id1A | -0.500 | NO  |
| 1mgtA | 1sfeA | 1.729  | YES |
| 1pg5B | 1nbeB | 0.634  | YES |
| 1pg5B | 1nbeB | 0.634  | YES |
| 1mp9A | 1qnaB | 0.076  | YES |
| 1qdlB | 1i7qB | 1.625  | YES |
| 1xttA | 1bd3A | 0.122  | YES |
| 1vphA | 1xbfA | -0.137 | NO  |
| 1v4nA | 1cb0A | 0.396  | YES |
| 1nogA | 1rtyA | 0.579  | YES |
| 1rlkA | 1q7sA | 0.611  | YES |
| 1urdA | 3mbpA | -1.081 | NO  |
| 1n1qA | 1jigA | -0.440 | NO  |
| 1amuA | 1mdbA | 0.306  | YES |
| 1amuA | 1mdbA | 0.306  | YES |
| 1amuA | 1mdbA | 0.306  | YES |
| 2cevA | 1t4tA | -0.221 | NO  |
| 1i5fA | 1mjcA | 0.393  | YES |
| 1r0rE | 1sbhA | -0.189 | NO  |
| 1gbgA | 2ayhA | -0.148 | NO  |
| 1i2sA | 1ylpA | 1.290  | YES |
| 1nrfA | 1xa1B | -1.082 | NO  |
| 1p6rA | 1okrB | -0.100 | NO  |
| 1skyB | 1w0jA | -0.477 | NO  |
| 1skyB | 1w0jA | -0.477 | NO  |
| 1skyB | 1w0jA | -0.477 | NO  |
| 3pvaA | 2bjfA | -0.490 | NO  |
| 1zinA | 1s3gA | 0.000  | YES |
| 1tilF | 1auzA | -0.493 | NO  |
| 1b4aA | 1f9nE | -0.128 | NO  |
| 1fc3A | 1lq1C | 0.103  | YES |
| 1gtfA | 1wapA | -0.176 | NO  |
| 1knvA | 1cfrA | 0.804  | YES |
| 1i6mA | 1yi8B | 0.860  | YES |
| 1b04A | 1ta8A | -0.184 | NO  |
| 1u4bA | 2kfnA | 0.120  | YES |
| 2ts1A | 1x8xA | 0.286  | YES |
| 2pjrA | 1uaaA | 0.115  | YES |
| 2pjrA | 1uaaA | 0.115  | YES |

|       |       |        |     |
|-------|-------|--------|-----|
| 2pjrA | 1uaaA | 0.115  | YES |
| 1g2wA | 1iyeA | 1.099  | YES |
| 1g2wA | 1iyeA | 1.099  | YES |
| 1rrsA | 1wefA | 0.350  | YES |
| 1seiA | 1s03G | 0.340  | YES |
| 1brwB | 2tptA | 0.459  | YES |
| 1brwB | 2tptA | 0.459  | YES |
| 1kkjA | 1eqbB | -0.364 | NO  |
| 1lqyA | 1lm4B | -0.597 | NO  |
| 4pfkA | 1pfkA | 0.144  | YES |
| 1y51A | 1sphA | 0.138  | YES |
| 1tigA | 2ifeA | -0.286 | NO  |
| 1wp5A | 1zi0B | 0.757  | YES |
| 1r2zA | 1pjjA | -0.953 | NO  |
| 1r2zA | 1pjjA | -0.953 | NO  |
| 1r2zA | 1pjjA | -0.953 | NO  |
| 1rfzA | 1y9iA | -0.042 | NO  |
| 1ebdA | 1lv1A | 0.381  | YES |
| 1ebdA | 1lv1A | 0.381  | YES |
| 1x87A | 1uwlA | 0.276  | YES |
| 1t8hA | 1rw0A | -0.505 | NO  |
| 1miwA | 1ou5A | -0.477 | NO  |
| 1u9cA | 1rw7A | -0.265 | NO  |
| 1phpA | 1hdiA | 0.381  | YES |
| 1phpA | 1hdiA | 0.381  | YES |
| 1keiA | 1espA | -0.054 | NO  |
| 1su7A | 1jqkA | 0.282  | YES |
| 1su7A | 1jqkA | 0.282  | YES |
| 1su7A | 1jqkA | 0.282  | YES |
| 1ov8A | 1cuoA | -2.911 | NO  |
| 2bm3A | 1qznA | 0.846  | YES |
| 1anuA | 1g1kA | 0.193  | YES |
| 1nbcA | 1g43A | 0.794  | YES |
| 1ybxA | 1pugA | 0.224  | YES |
| 1xquA | 1kpfA | -0.085 | NO  |
| 1xrgA | 1oniA | 0.904  | YES |
| 1f5jA | 1igoA | -1.279 | NO  |
| 1mqqa | 1gqiA | 0.465  | YES |
| 1ynrA | 351cA | 0.781  | YES |
| 1rfkB | 1czpA | -0.152 | NO  |
| 1vf5A | 1q90B | 0.307  | YES |
| 1vf5C | 1q90A | -0.432 | NO  |
| 1ycgA | 1e5dA | 0.068  | YES |
| 1ycgA | 1e5dA | 0.068  | YES |
| 1y80A | 1bmtA | -0.535 | NO  |
| 1bawA | 7pcyA | 0.993  | YES |
| 1ugsA | 1ahjA | 1.162  | YES |
| 1h0bA | 2nlrA | 1.331  | YES |
| 1rblA | 1rboB | 0.128  | YES |
| 1rblA | 1rboB | 0.128  | YES |
| 1ktpA | 1jboA | 0.001  | YES |
| 1obrA | 1m4lA | 0.098  | YES |
| 1yfzA | 1tc1B | 0.770  | YES |
| 1lf6A | 1ulvA | 1.626  | YES |
| 1ykfA | 1jqbA | -0.017 | NO  |
| 1iuaA | 1ckuA | 0.109  | YES |

|       |       |        |     |
|-------|-------|--------|-----|
| 1eysM | 1dxrM | 0.279  | YES |
| 1eysC | 1prcC | -0.114 | NO  |
| 1eysH | 1prcH | 0.529  | YES |
| 1tf4A | 1g87B | -0.539 | NO  |
| 1mz4A | 1flcA | 0.518  | YES |
| 1v2zA | 1r5qA | 0.328  | YES |
| 1o4vA | 1xmpC | 0.451  | YES |
| 1inlC | 1iy9A | 0.055  | YES |
| 1wosA | 1yx2B | 0.222  | YES |
| 1wosA | 1yx2B | 0.222  | YES |
| 1nz0A | 1a6fA | 0.750  | YES |
| 1o12A | 2vhlB | 0.907  | YES |
| 1u0lA | 1t9hA | 0.559  | YES |
| 1u0lA | 1t9hA | 0.559  | YES |
| 1vlqA | 1l7aA | 0.202  | YES |
| 1vq0B | 1vzyA | 0.811  | YES |
| 1vq0B | 1vzyA | 0.811  | YES |
| 1ww1A | 1y44B | 0.583  | YES |
| 2a61A | 1s3jA | 1.087  | YES |
| 1vl4A | 1vpbA | 0.465  | YES |
| 1vmaA | 1ftsA | 0.464  | YES |
| 1vmaA | 1ftsA | 0.464  | YES |
| 1dd3A | 1ctfA | -0.393 | NO  |
| 1sg9A | 1t43A | 2.274  | YES |
| 1sg9A | 1t43A | 2.274  | YES |
| 1r3eA | 1k8wA | 1.244  | YES |
| 1wa3A | 1euaA | 1.280  | YES |
| 1eg5A | 1p3wA | 0.531  | YES |
| 1j6oA | 1xwyA | 1.599  | YES |
| 1l1jA | 1te0A | 1.026  | YES |
| 1m4yA | 1e94A | -0.098 | NO  |
| 1mkmA | 1tf1A | 2.144  | YES |
| 1o1xA | 1nn4B | 0.629  | YES |
| 1o6dA | 1ns5A | 1.262  | YES |
| 1pvtA | 1gt7A | 1.645  | YES |
| 1vkzA | 1gsoA | 1.223  | YES |
| 1vlaA | 1ml8A | 1.224  | YES |
| 1vmdB | 1s89B | 1.622  | YES |
| 1vpaA | 1i52A | 1.502  | YES |
| 1j6uA | 1gqyB | 0.731  | YES |
| 1j6uA | 1gqyB | 0.731  | YES |
| 1o5zA | 1jbwA | 1.740  | YES |
| 1hh2P | 1k0rA | 1.312  | YES |
| 1hh2P | 1k0rA | 1.312  | YES |
| 1o54A | 1i9gA | 1.785  | YES |
| 1o54A | 1i9gA | 1.785  | YES |
| 1o4uB | 1qpoA | 1.666  | YES |
| 1o4uB | 1qpoA | 1.666  | YES |
| 1tzvA | 1eyvA | 1.890  | YES |
| 2btyA | 2bufA | 0.859  | YES |
| 1tqgA | 1i5nC | 1.464  | YES |
| 1rq0B | 1zbtA | 0.370  | YES |
| 1vjrA | 1ys9A | 1.526  | YES |
| 1vknA | 1xygA | 0.550  | YES |
| 1cz3A | 1qzfA | 0.499  | YES |
| 1q7zA | 1lt8A | 0.480  | YES |

|       |       |        |     |
|-------|-------|--------|-----|
| 1o0wA | 2a11A | 1.766  | YES |
| 1o20A | 1vluA | 0.532  | YES |
| 1v11A | 1y89A | 1.325  | YES |
| 1up7A | 1u8xX | 0.951  | YES |
| 1up7A | 1u8xX | 0.951  | YES |
| 1vpqA | 1vpyA | 0.829  | YES |
| 1vljA | 1oj7A | 1.058  | YES |
| 1vljA | 1oj7A | 1.058  | YES |
| 1vm7B | 1rkdA | 1.227  | YES |
| 1vlgA | 1eumA | 0.601  | YES |
| 1vkuA | 1t8kA | 2.253  | YES |
| 1vpkA | 1ok7A | 0.829  | YES |
| 1vpkA | 1ok7A | 0.829  | YES |
| 1vpkA | 1ok7A | 0.829  | YES |
| 1z85B | 1nxzA | 0.744  | YES |
| 1usyE | 1nh8A | 1.624  | YES |
| 1vrgA | 1on3A | 0.607  | YES |
| 1vrgA | 1on3A | 0.607  | YES |
| 1zh8A | 1h6dB | 1.018  | YES |
| 1z82A | 1n1eA | 0.455  | YES |
| 1z82A | 1n1eA | 0.455  | YES |
| 1vp5A | 1vbjA | 0.190  | YES |
| 1vlhC | 1qjcA | 1.414  | YES |
| 1h98A | 7fd1A | 0.451  | YES |
| 1ewqA | 1w7aA | 0.265  | YES |
| 1ewqA | 1w7aA | 0.265  | YES |
| 1ewqA | 1w7aA | 0.265  | YES |
| 1rvgB | 1gvfB | 0.477  | YES |
| 1bxbA | 2gyiA | 0.717  | YES |
| 1bdmB | 1b8pA | 0.339  | YES |
| 1bdmB | 1b8pA | 0.339  | YES |
| 1vbiA | 1z2iA | 0.766  | YES |
| 3mdsA | 1gv3A | 0.784  | YES |
| 1udxA | 1lnzA | -0.327 | NO  |
| 1odeA | 1dbfA | -1.380 | NO  |
| 1v4vA | 1o6cB | -0.348 | NO  |
| 1v8qA | 1y69U | -0.472 | NO  |
| 1wkiA | 1y69K | -0.225 | NO  |
| 1ipdA | 1cm7A | 0.459  | YES |
| 1aipA | 1efuA | -0.173 | NO  |
| 1aipA | 1efuA | -0.173 | NO  |
| 1we3A | 1pcqA | 0.446  | YES |
| 1vc4A | 1piiA | 0.523  | YES |
| 1uluB | 1qsgA | 0.188  | YES |
| 1l0wA | 1il2A | 0.315  | YES |
| 1l0wA | 1il2A | 0.315  | YES |
| 1iw7A | 1bdfA | 0.226  | YES |
| 2prdA | 1i40A | -0.061 | NO  |
| 1v5xA | 1piiA | 0.482  | YES |
| 1iv3A | 1h48A | -0.141 | NO  |
| 1iy2A | 1lv7A | 0.296  | YES |
| 1iy2A | 1lv7A | 0.296  | YES |
| 1odlA | 1k9sA | -1.172 | NO  |
| 1korB | 1k92A | 0.540  | YES |
| 1korB | 1k92A | 0.540  | YES |
| 1vcoA | 1slmB | 0.163  | YES |

|       |       |        |     |
|-------|-------|--------|-----|
| 1vcoA | 1s1mB | 0.163  | YES |
| 1we3O | 1pcqO | 0.380  | YES |
| 1adjA | 1kmmA | 0.931  | YES |
| 1ixrA | 1d8lA | -0.261 | NO  |
| 1ixrA | 1d8lA | -0.261 | NO  |
| 1j1yA | 1psuA | 0.151  | YES |
| 1j3bA | 1oenA | 0.361  | YES |
| 1j3bA | 1oenA | 0.361  | YES |
| 1kijA | 1ei1A | 0.064  | YES |
| 1kijA | 1ei1A | 0.064  | YES |
| 1oi7A | 1jkjA | -0.087 | NO  |
| 1qvrA | 1khyD | 1.800  | YES |
| 1qvrA | 1r6bX | 0.385  | YES |
| 1qvrA | 1r6bX | 0.385  | YES |
| 1ub7A | 1hnjA | 0.373  | YES |
| 1uekA | 1oj4A | -0.180 | NO  |
| 1uf9A | 1viyA | 1.394  | YES |
| 1ukkA | 1nyeA | 0.329  | YES |
| 1v93A | 1b5tA | 0.099  | YES |
| 1wubA | 1y0gA | -0.655 | NO  |
| 1ve1A | 1y7lA | 0.153  | YES |
| 1v8mA | 1mqwA | 2.089  | YES |
| 1v8fA | 1mopA | 1.116  | YES |
| 1j3lD | 1nxjA | 1.411  | YES |
| 1wkcA | 1sbqA | -0.474 | NO  |
| 1iugA | 1vjoA | 0.611  | YES |
| 1v9cB | 1f2vA | 0.447  | YES |
| 1ve2B | 1s4dB | 0.602  | YES |
| 1umdA | 1qs0A | 0.828  | YES |
| 1j33A | 115oA | 0.202  | YES |
| 1iqrA | 1tezB | 0.866  | YES |
| 1j3nA | 1e5mA | 0.126  | YES |
| 1j3nA | 1e5mA | 0.126  | YES |
| 1eh1A | 1is1A | -0.150 | NO  |
| 1ulqA | 1m3kA | 0.168  | YES |
| 1wekA | 2a33B | -0.720 | NO  |
| 1uarA | 1orbA | 0.495  | YES |
| 1uarA | 1orbA | 0.495  | YES |
| 1yyaA | 1tph1 | -0.350 | NO  |
| 1umdB | 1x7yB | 0.019  | YES |
| 1umdB | 1x7yB | 0.019  | YES |
| 1atiA | 1g5hA | 0.070  | YES |
| 1v47A | 1i2dA | 0.292  | YES |
| 1v47A | 1i2dA | 0.292  | YES |
| 1onlA | 1dxmA | -0.633 | NO  |
| 1uiyA | 1dciA | -0.037 | NO  |
| 1usoA | 1dcoC | 0.177  | YES |
| 1fnmA | 1zm9A | 0.006  | YES |
| 1ka9H | 1ox6A | -0.453 | NO  |
| 1iq0A | 1f7uA | -0.710 | NO  |
| 1ukwA | 3mddA | 0.136  | YES |
| 1ukwA | 3mddA | 0.136  | YES |
| 1ukwA | 3mddA | 0.136  | YES |
| 1wx0A | 1l6wA | 0.459  | YES |
| 1tuxA | 1ta3B | -0.193 | NO  |
| 1gt6A | 4tglA | 0.139  | YES |

**Figure S1.** The ROC curve of the scoring function in discriminating 540 pairs of ortholog protein sequences accumulated from the testing sets in the 5-fold cross validation.

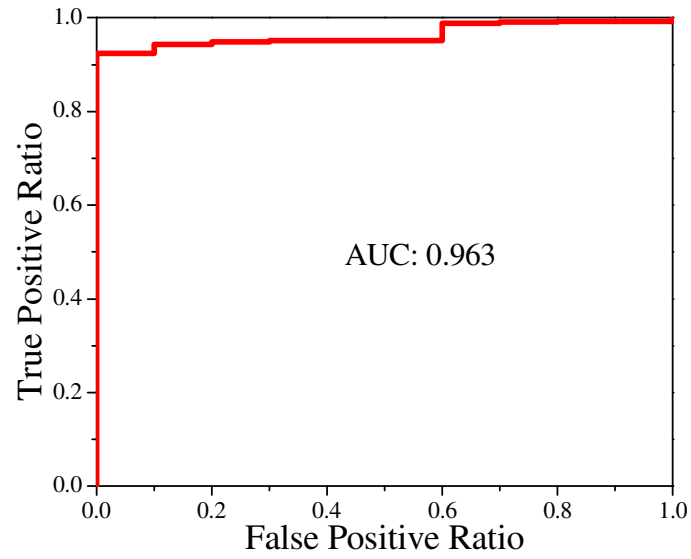

Supplement: Additional file 1 [file 1471-2105-11-62-s1.pdf]
